# Supplementary material for: Comparative and Evolutionary Analysis of the HES/HEY Gene Family Reveal Exon/Intron Loss and Teleost Specific Duplication Events
Source: PLoS One. 2012 Jul 13;7(7):e40649. doi: 10.1371/journal.pone.0040649 (PMC3396596; doi:10.1371/journal.pone.0040649)

# human HES/HEY

HEY group

Hs-HEY1

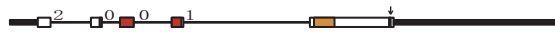

Hs-HEY2

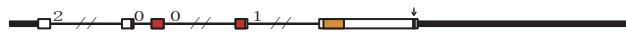

Hs-HEYL

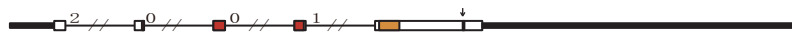

DEC group

Hs-DEC1

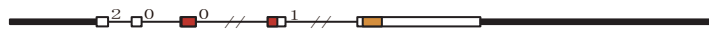

Hs-DEC2

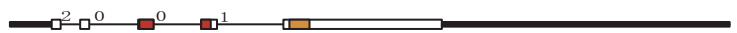

HESL group

Hs-HESL

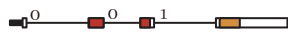

HES group

Hs-HES1

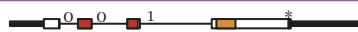

Hs-HES4

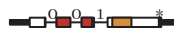

Hs-HES3

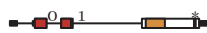

Hs-HES6

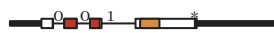

Hs-HES2

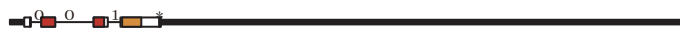

Hs-HES7

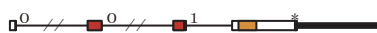

Hs-HES5

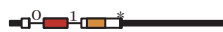

Supplement: Figure S4 — Exon-intron structure of human HES/HEY genes. The color representations have described in Figure 3. The four groups of HEY1/2/L, DEC1/2, HESL, and HES1-7 were circled by purple boxes. (PDF) [file pone.0040649.s004.pdf]
