# Supplementary material for: Comparative and Evolutionary Analysis of the HES/HEY Gene Family Reveal Exon/Intron Loss and Teleost Specific Duplication Events
Source: PubMed Central journal article supplement (PMC3396596; doi:10.1371/journal.pone.0040649), 2012-07-13

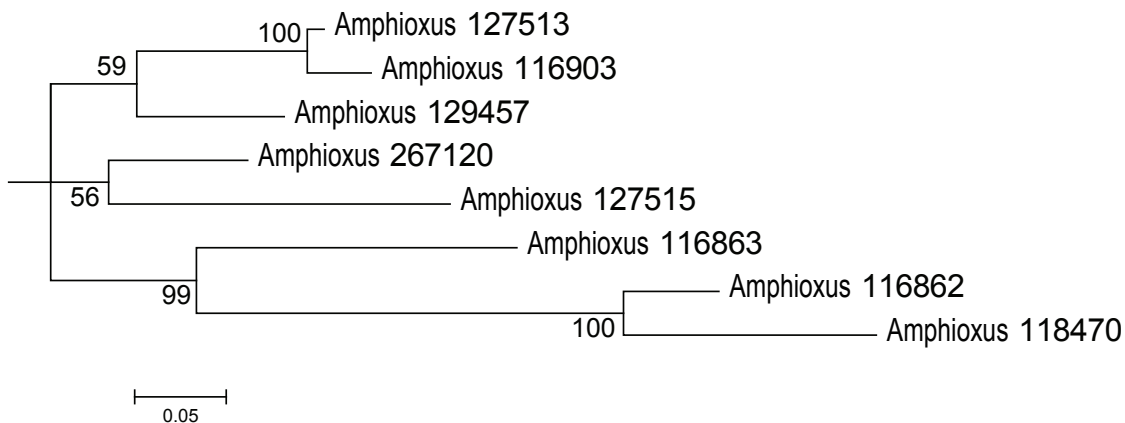

**Amphioxus (8)**

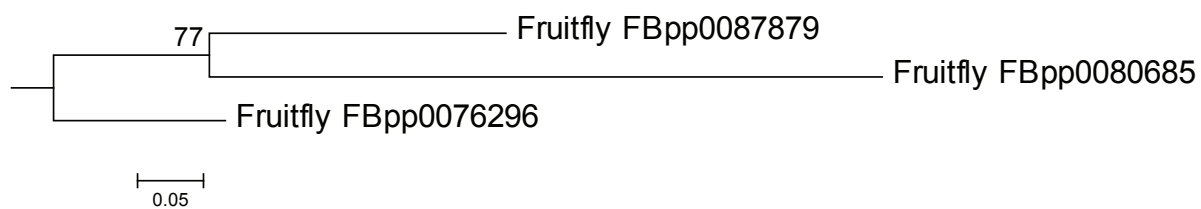

**Fruitfly (3)**

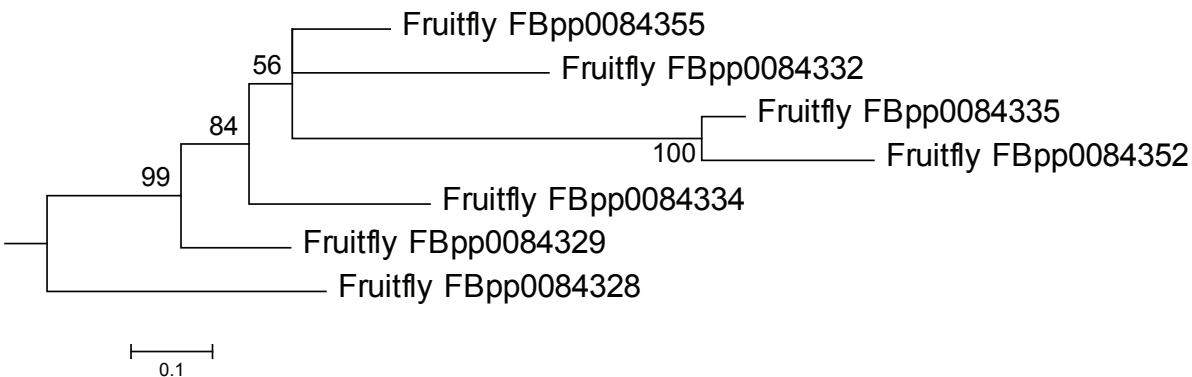

**Fruitfly (7)**

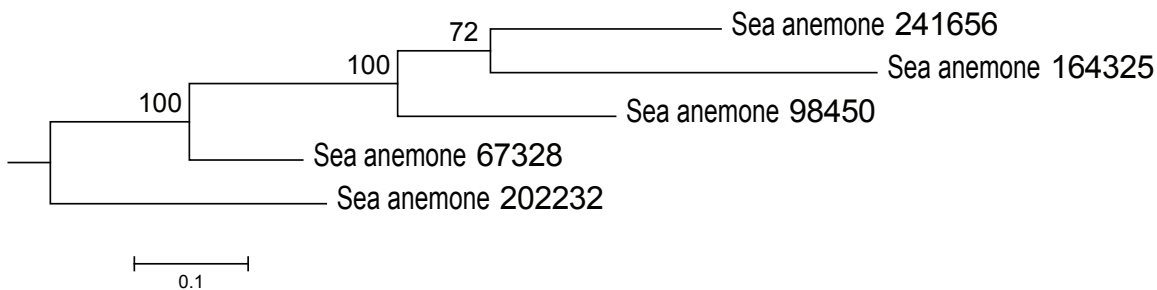

**Sea\_Anemones (5)**

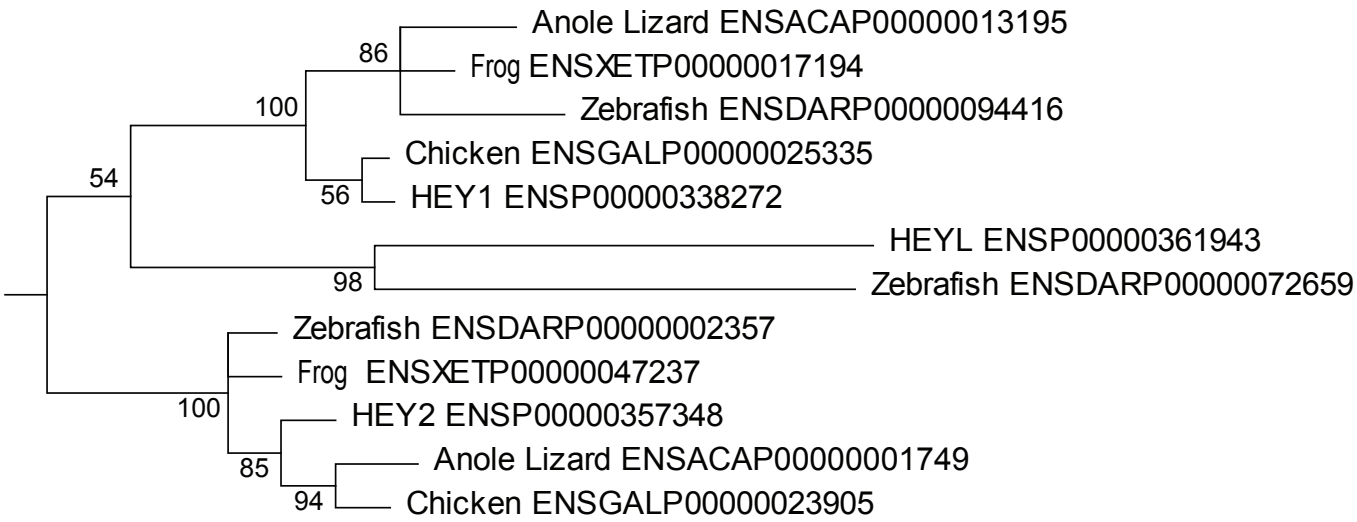

0.02

V-HEY1/2/L

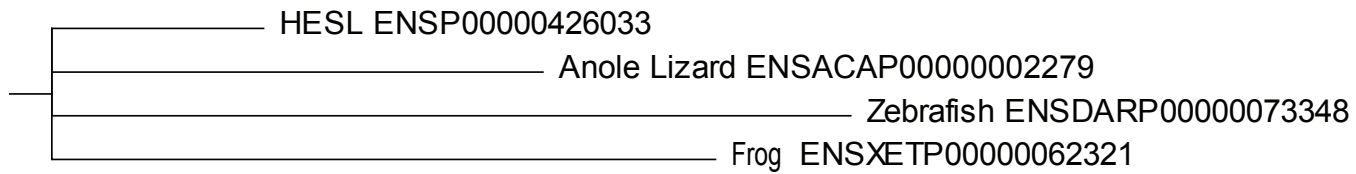

0.01

V-HESL

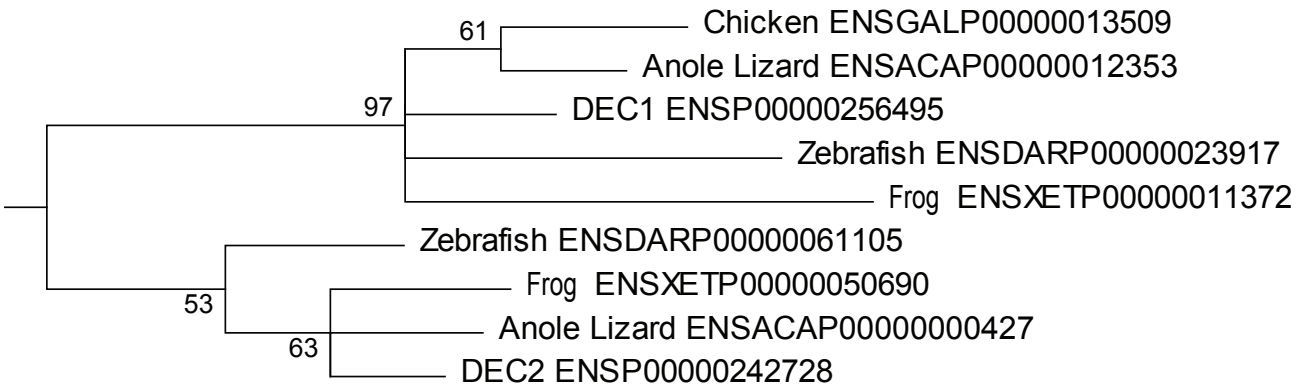

0.05

V-DEC1/2

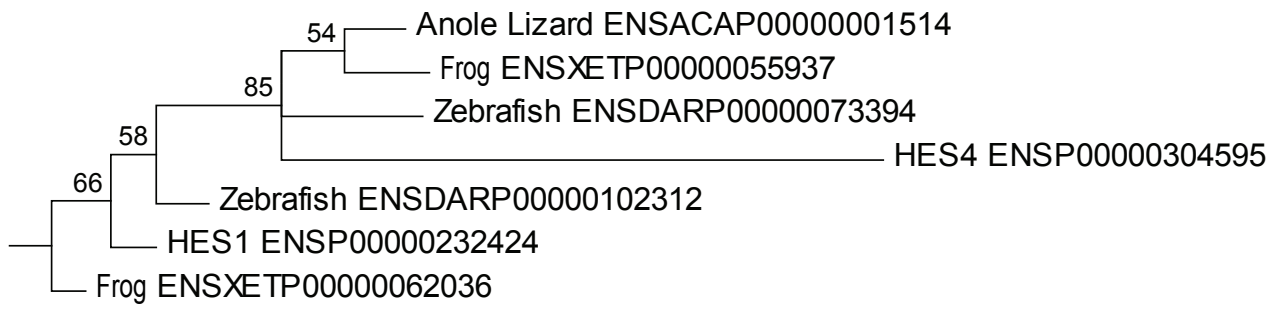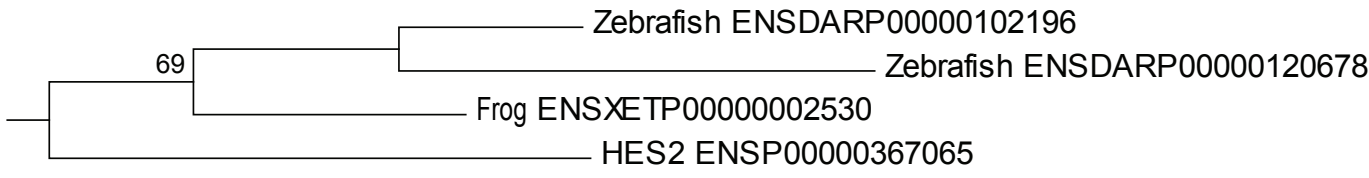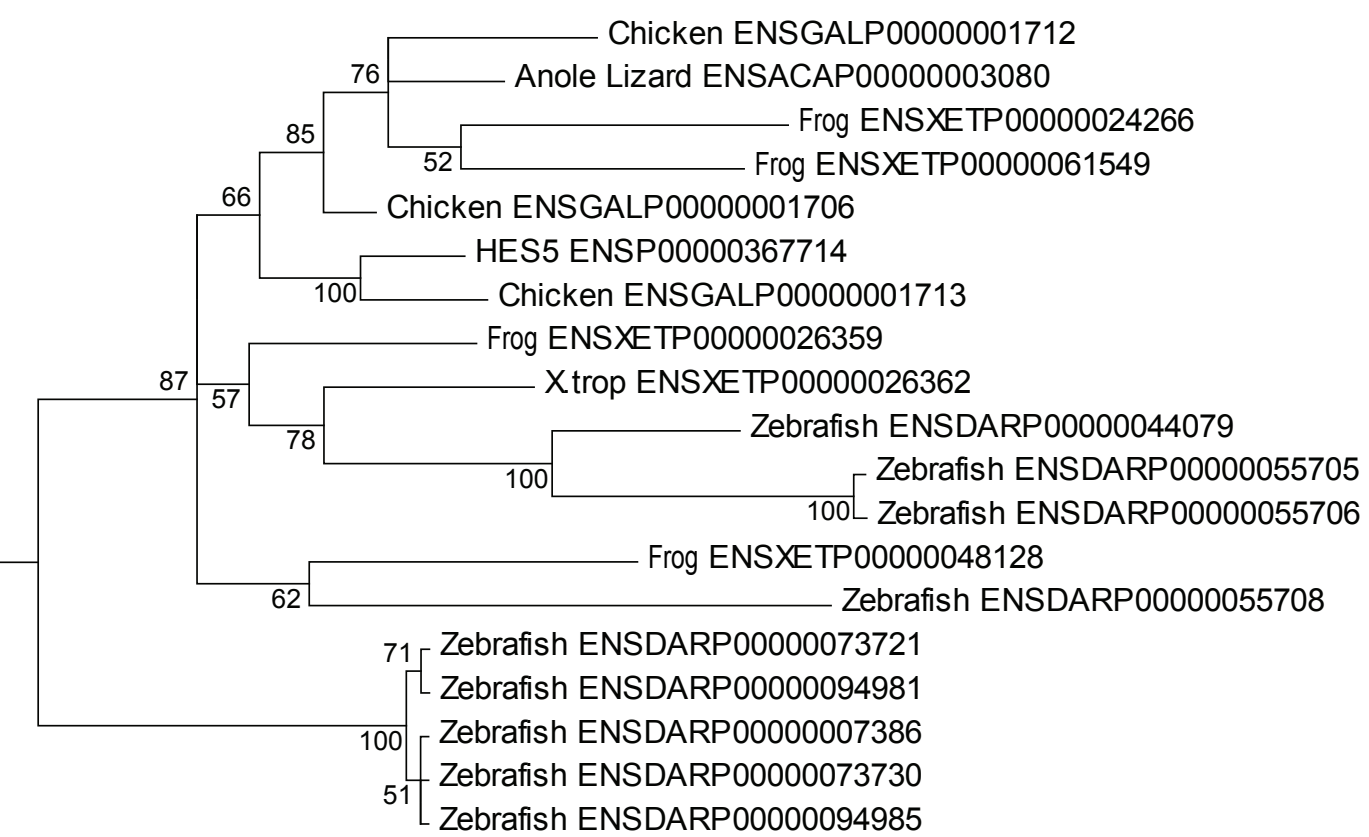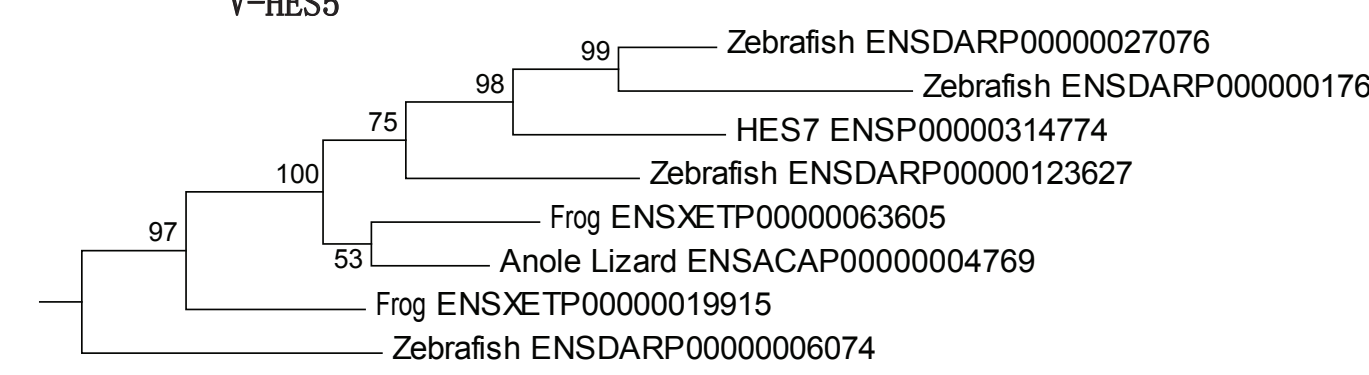

Supplement: pone.0040649.s002.pdf [file pone.0040649.s002.pdf]
