# Supplementary material for: Comparative and Evolutionary Analysis of the HES/HEY Gene Family Reveal Exon/Intron Loss and Teleost Specific Duplication Events
Source: PubMed Central journal article supplement (PMC3396596; doi:10.1371/journal.pone.0040649), 2012-07-13

**A****HES/HEY-ML (JTT+I+G)**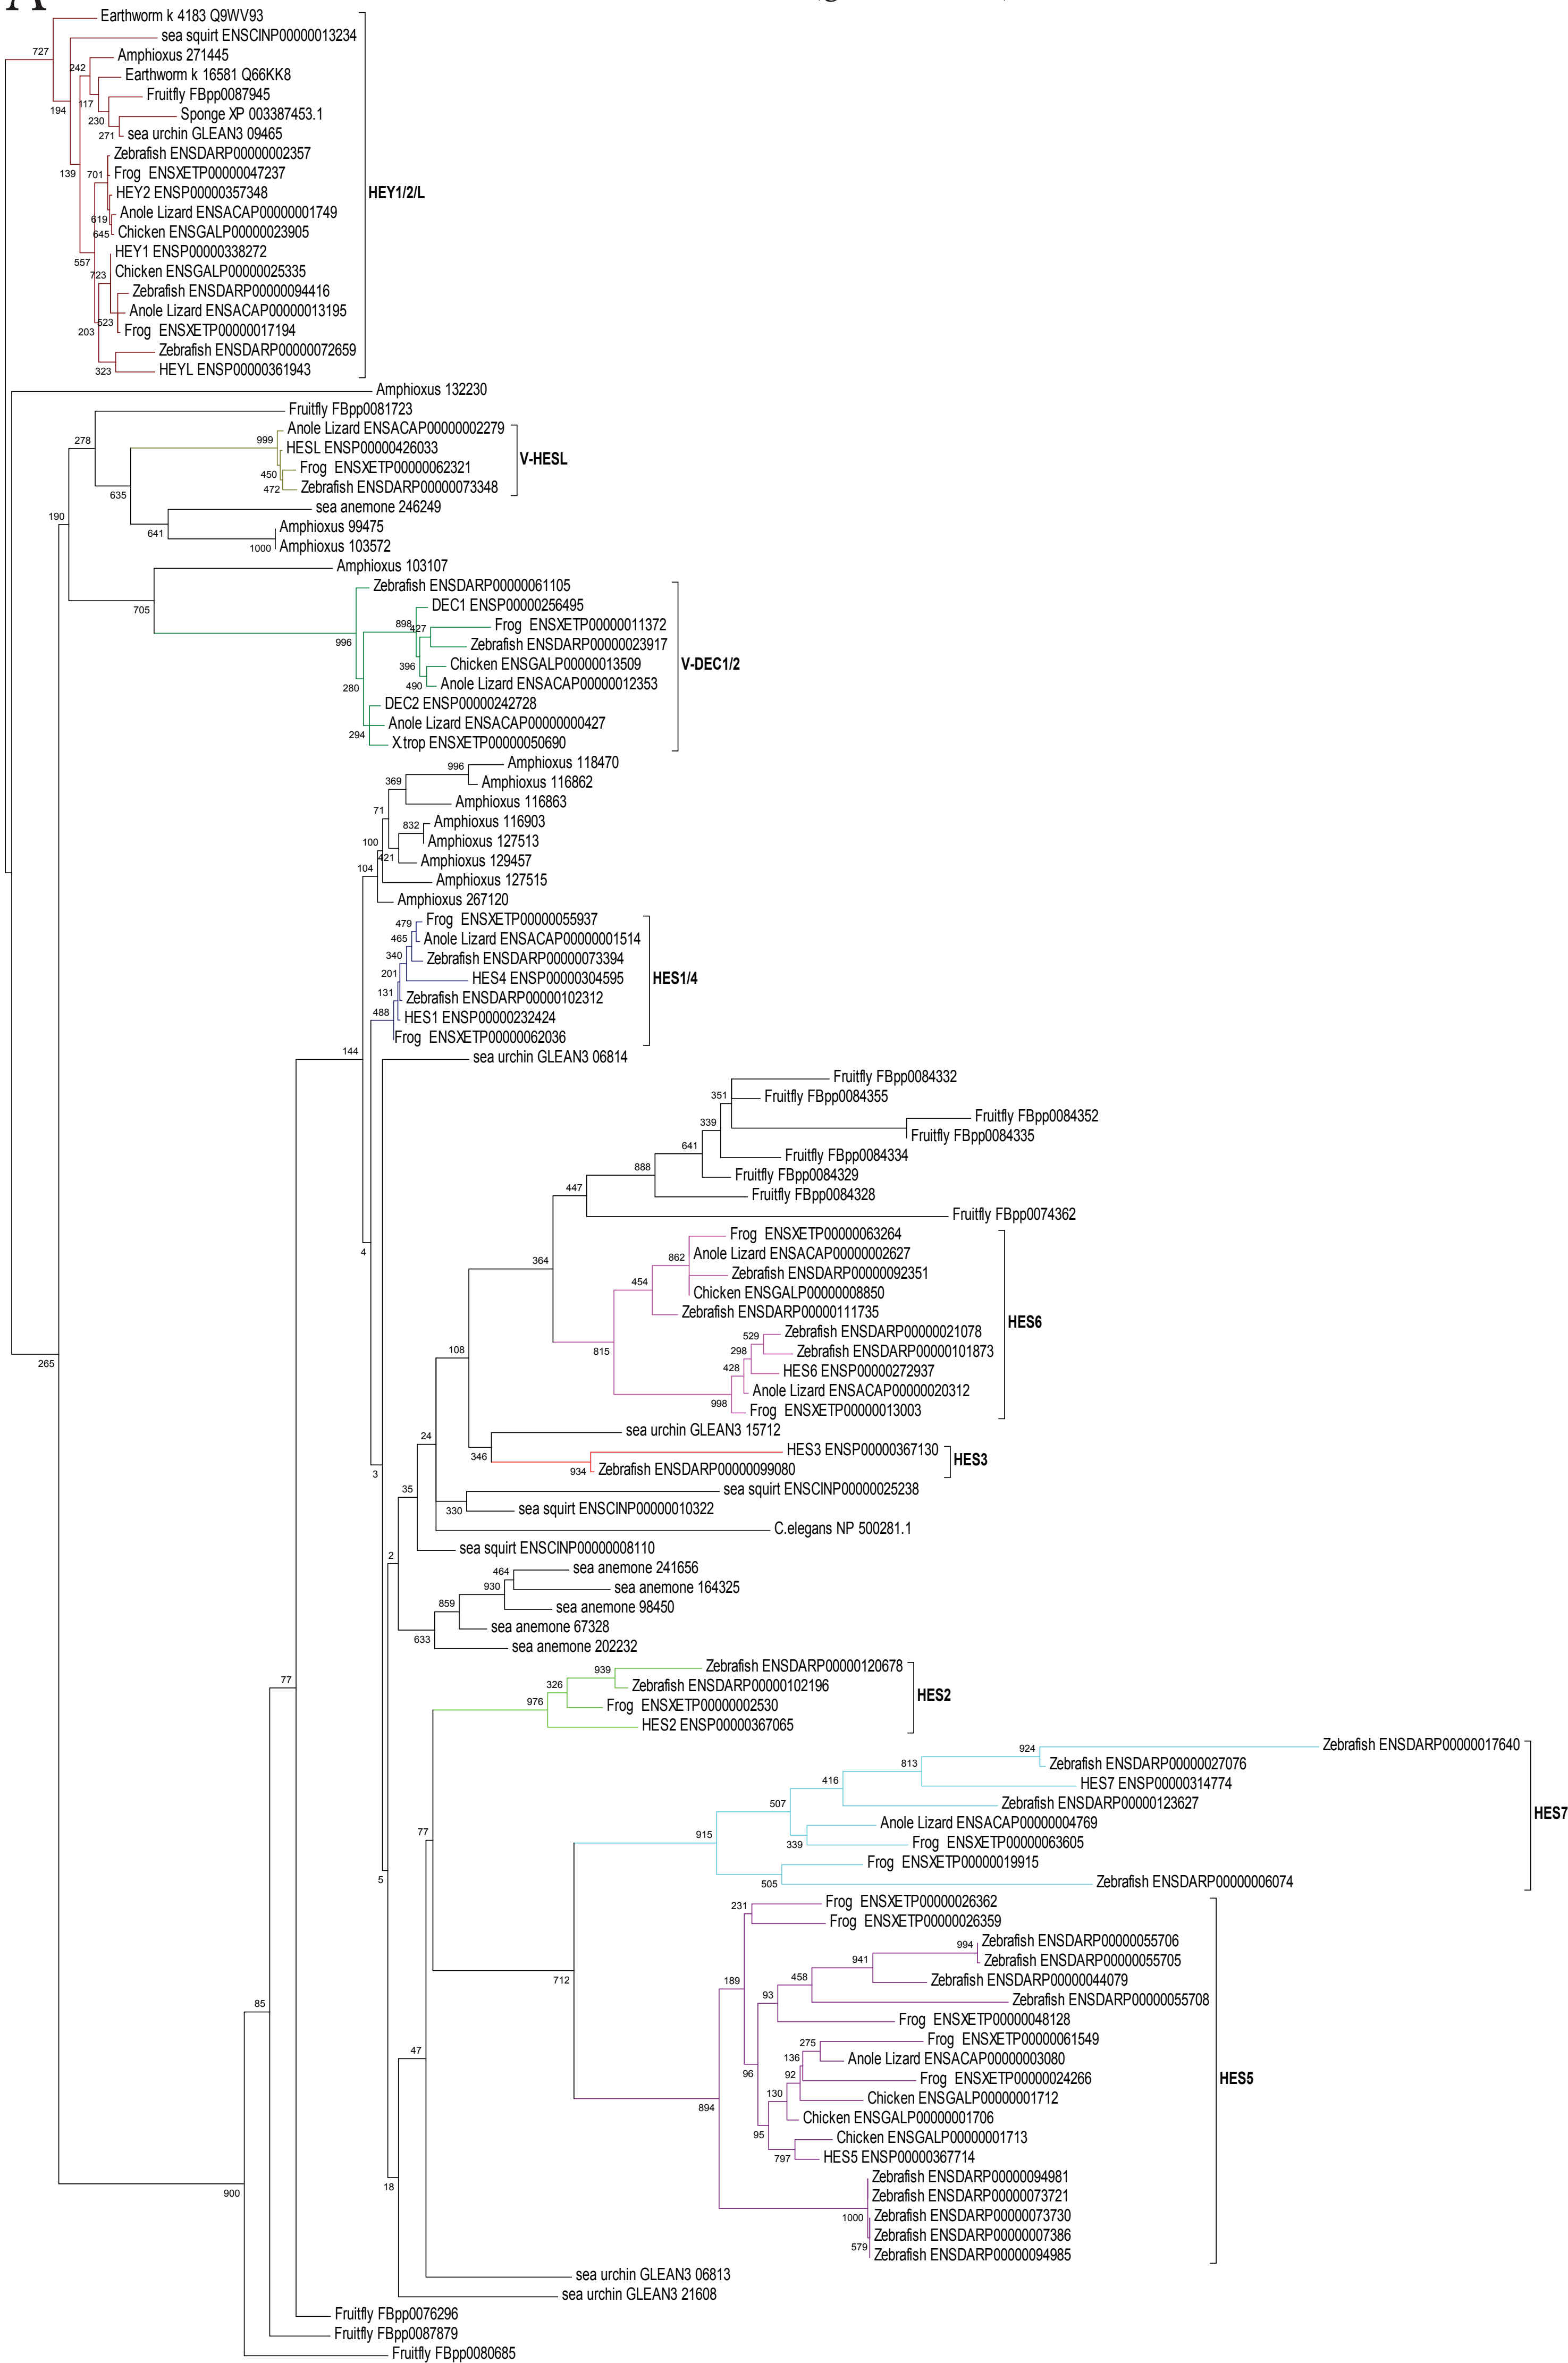

**B****HES/HEY-ME (JTT, partial deletion, Interior-branch test)**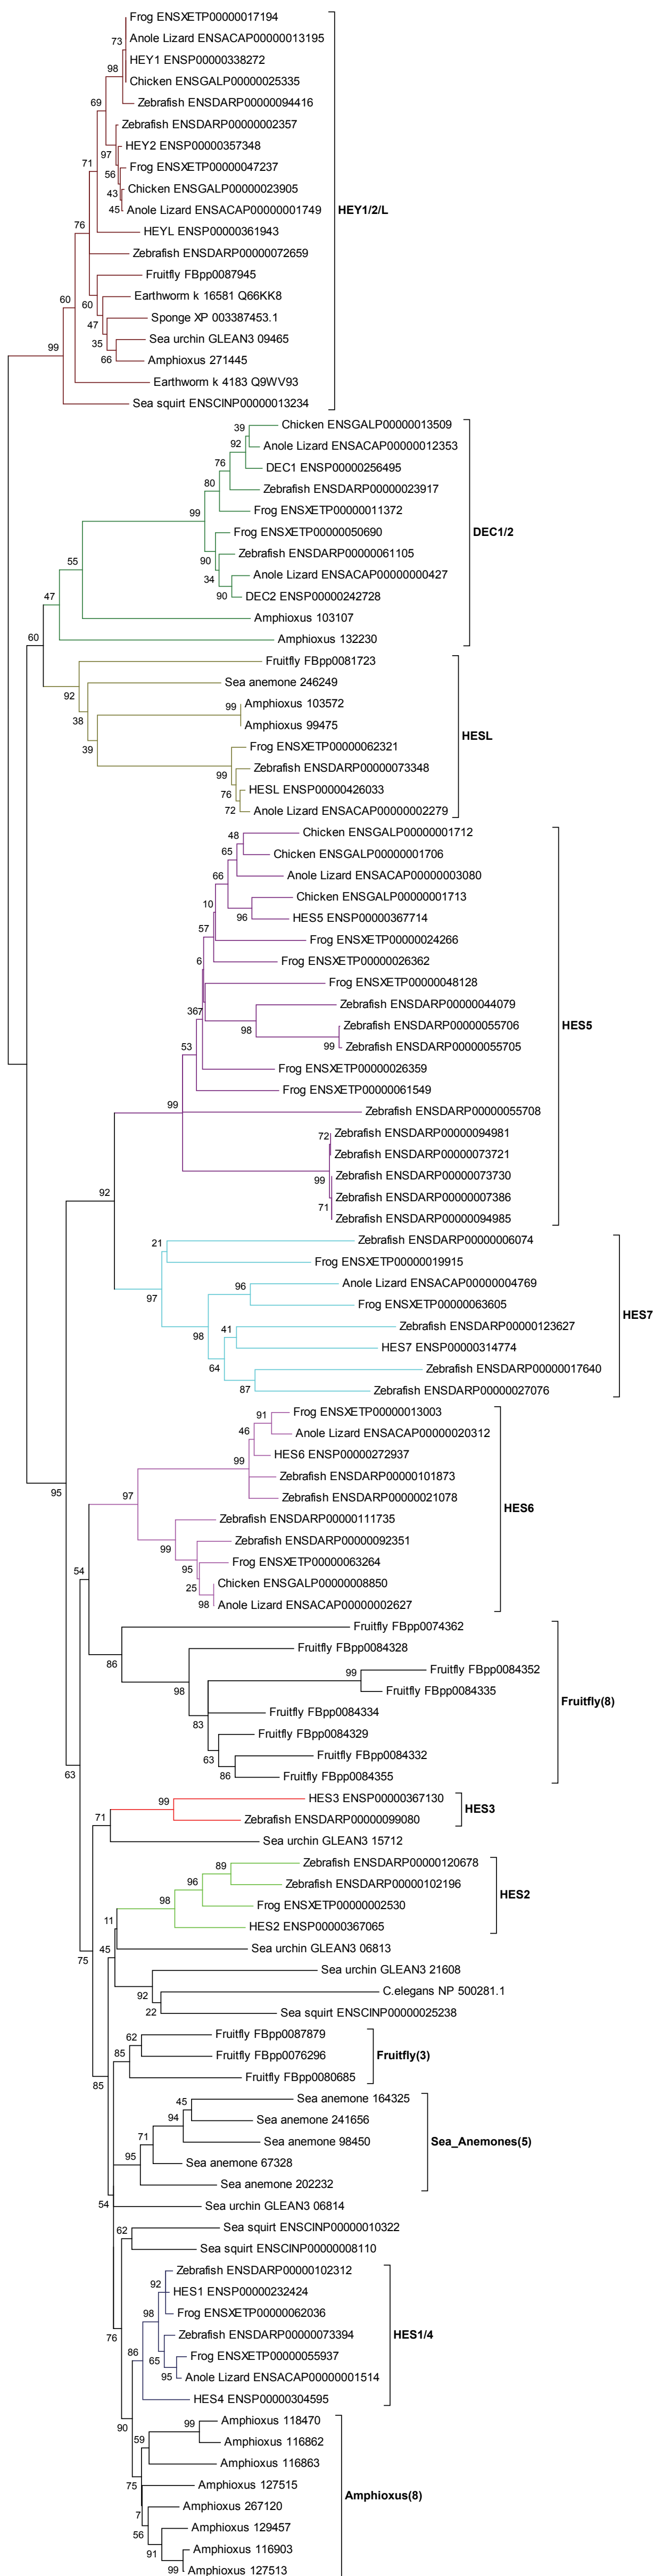

# C HES/HEY-NJ (JTT, partial deletion, Interior-branch test)

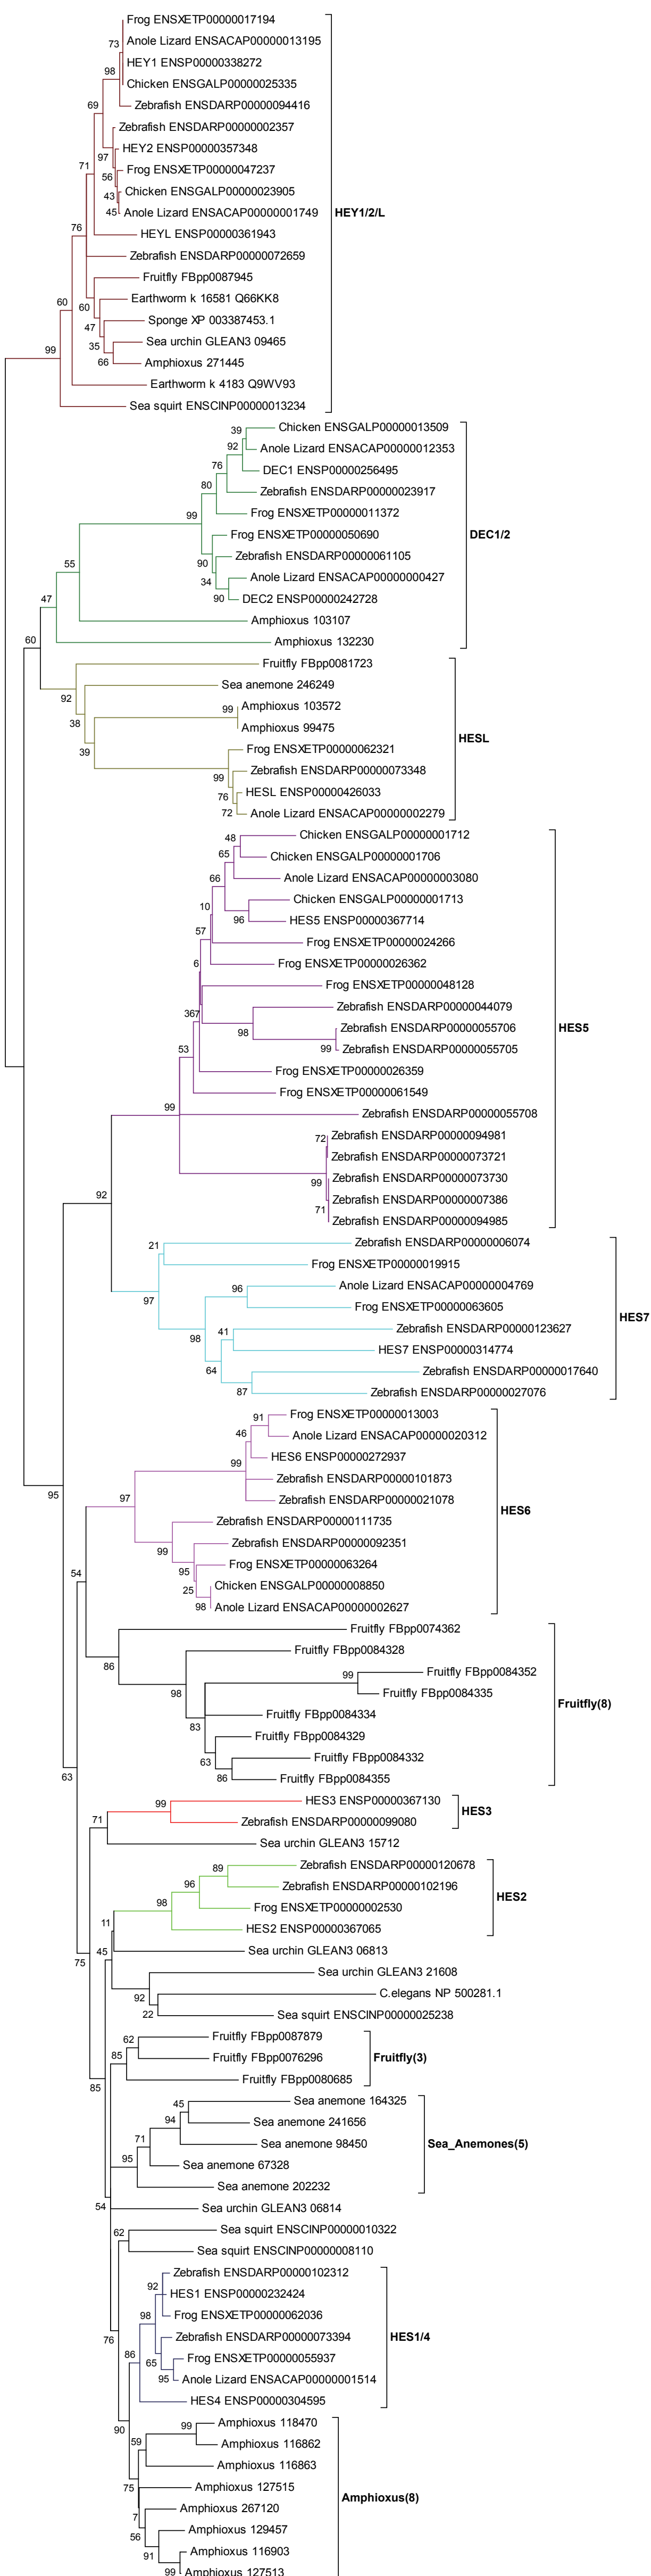

Supplement: pone.0040649.s003.pdf [file pone.0040649.s003.pdf]
