# Supplementary material for: Comparative and Evolutionary Analysis of the HES/HEY Gene Family Reveal Exon/Intron Loss and Teleost Specific Duplication Events
Source: PubMed Central journal article supplement (PMC3396596; doi:10.1371/journal.pone.0040649), 2012-07-13
Supplement: pone.0040649.s006.pdf [file pone.0040649.s006.pdf]

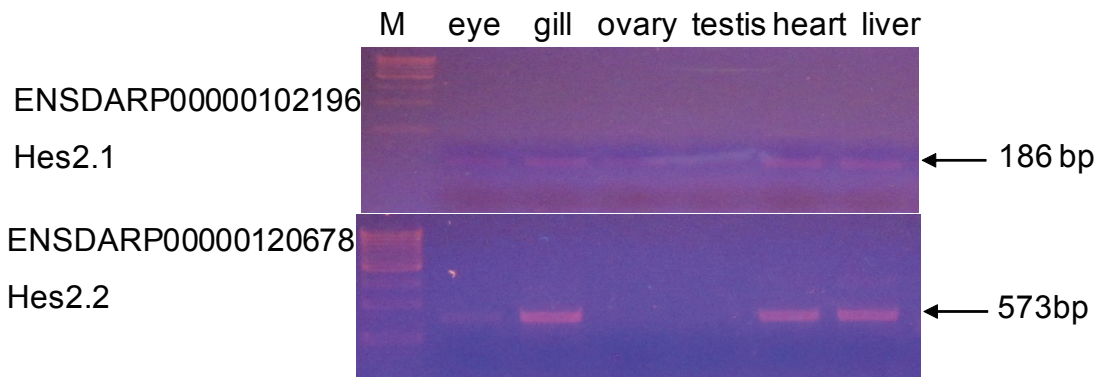

### HES2 expression in zebrafish by RT-PCR

(a)

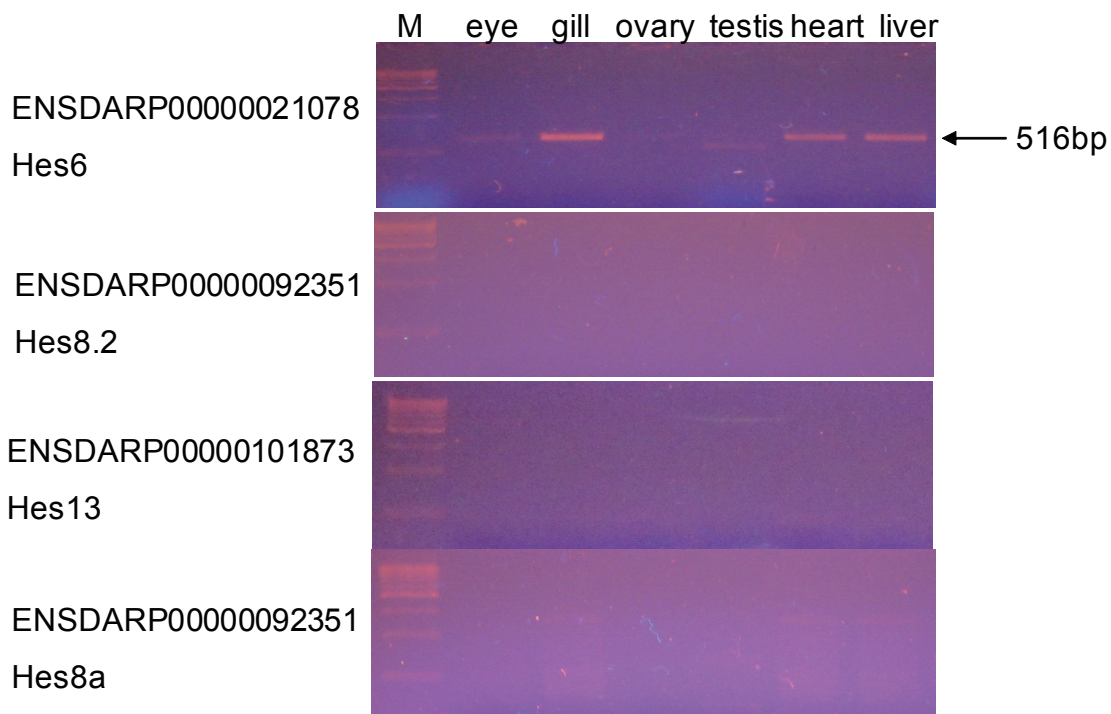

### HES6 expression in zebrafish by RT-PCR

(b)
